# Supplementary material for: Reliable experimental method for determination of photoacidity revealed by quantum chemical calculations
Source: Royal Society of Chemistry journal article supplement (doi:10.1039/d2cp03308a), 2022-01-01
Supplement: d2cp03308a1.pdf [file d2cp03308a1.pdf]

## Electronic Supplementary Information

# Reliable experimental method for determination of photoacidity revealed by quantum chemical calculations

Joonyoung F. Joung,<sup>‡</sup> Minseok Jeong,<sup>‡</sup> and Sungnam Park\*

Department of Chemistry and Research Institute for Natural Science, Korea University,  
Seoul, 02841, Korea

\*E-mail: spark8@korea.ac.kr (S.P.)

<sup>‡</sup> These authors contributed equally.

**Table S1.** Various  $pK_a^*$  values of coumarin 183 depending on experimental methods.

| <b>Method</b>             |                                                                                                 | <b><math>pK_a^*</math></b> |
|---------------------------|-------------------------------------------------------------------------------------------------|----------------------------|
| Fluorescence titration    |                                                                                                 | 1.20                       |
| Time-resolved experiments |                                                                                                 | -1.84                      |
| Förster cycle             | Maximum absorption wavelength, $\lambda_{\text{abs, max}}$                                      | -5.90                      |
|                           | Maximum emission wavelength, $\lambda_{\text{emi, max}}$                                        | 0.95                       |
|                           | Average of maximum absorption and emission wavelengths, $\lambda_{\text{avg, max}}$             | -2.47                      |
|                           | Average of the first moments of absorption and emission spectra, $\lambda_{\text{avg, moment}}$ | 0.79                       |
|                           | Cross point                                                                                     | -1.85                      |
|                           | Optical bandgap                                                                                 | -1.50                      |

**Table S2.** Experimentally-determined  $pK_a$  and  $pK_a^*$  values of photoacids reported in the literature.

| Photoacids                  | Ground state $pK_a$ | Fluorescence titration | Förster cycle       | Time-resolved experiment                   |
|-----------------------------|---------------------|------------------------|---------------------|--------------------------------------------|
| Coumarin 183                | 5.5 <sup>1-3</sup>  | 1.20 <sup>1-3</sup>    | 0.79 <sup>1-3</sup> | -1.84 <sup>1-3</sup>                       |
| HPTS                        | 7.7 <sup>4</sup>    | 1.42 <sup>5</sup>      |                     | 1.41 <sup>a4</sup>                         |
| 2-naphthol                  | 9.45 <sup>6</sup>   | 2.80 <sup>7</sup>      | 2.80 <sup>7</sup>   | 2.90 <sup>8</sup>                          |
| 1-naphthol                  | 9.4 <sup>9</sup>    |                        | 1.86 <sup>10</sup>  | 0.43 <sup>11</sup><br>-0.20 <sup>a12</sup> |
| 5-sulfonate-1-naphthol      | 8.4 <sup>13</sup>   |                        | -0.70 <sup>13</sup> |                                            |
| 3,6-disulfonate-1-naphthol  | 8.6 <sup>13</sup>   |                        | -2.60 <sup>13</sup> |                                            |
| 5-cyano-1-naphthol          | 8.05 <sup>14</sup>  |                        | -2.80 <sup>14</sup> |                                            |
| 5-tButyl-1-naphthol         | 9.8 <sup>13</sup>   |                        | 1.00 <sup>13</sup>  |                                            |
| 5-cyano-2-naphthol          | 8.75 <sup>6</sup>   | 1.70 <sup>6</sup>      | -1.20 <sup>6</sup>  | -0.75 <sup>a15</sup>                       |
| 6-cyano-2-naphthol          | 8.4 <sup>6</sup>    | 0.50 <sup>6</sup>      | 0.20 <sup>6</sup>   | -0.37 <sup>a15</sup>                       |
| 7-cyano-2-naphthol          | 8.75 <sup>6</sup>   | 2.00 <sup>6</sup>      | -1.30 <sup>6</sup>  | -0.21 <sup>a15</sup>                       |
| 8-cyano-2-naphthol          | 8.35 <sup>6</sup>   | 0.70 <sup>6</sup>      | -0.40 <sup>6</sup>  | -0.76 <sup>a15</sup>                       |
| 5,8-dicyano-2-naphthol      | 7.8 <sup>6</sup>    |                        | -4.50 <sup>15</sup> |                                            |
| MHQ                         |                     |                        |                     | -0.13 <sup>a16</sup>                       |
| QCy9                        | 4.3 <sup>17</sup>   |                        | -8.50 <sup>17</sup> |                                            |
| HPTS-derivative 1a          | 4.4 <sup>18</sup>   |                        | -3.90 <sup>18</sup> |                                            |
| HPTS-derivative 1b          | 5.7 <sup>18</sup>   |                        | -0.90 <sup>18</sup> |                                            |
| 5-amino-2-naphthol (N-A)    | 9.5 <sup>19</sup>   |                        | 10.24 <sup>19</sup> | 9.50 <sup>19</sup>                         |
| 5-amino-2-naphthol (C-N)    | 4.0 <sup>19</sup>   |                        | -4.21 <sup>19</sup> |                                            |
| 5-amino-2-naphthol (C-Z)    |                     |                        |                     | 1.10 <sup>19</sup>                         |
| 6-Carboxy-2-naphthol (OH)   | 8.9 <sup>20</sup>   |                        | 1.40 <sup>20</sup>  |                                            |
| 6-Carboxy-2-naphthol (COOH) | 4.3 <sup>20</sup>   |                        | 7.80 <sup>20</sup>  |                                            |
| 6-Carboxylate-2-naphthol    | 9.5 <sup>20</sup>   |                        | 2.50 <sup>20</sup>  |                                            |
| 6-Methylester-2-naphthol    | 8.6 <sup>20</sup>   |                        | -1.20 <sup>20</sup> |                                            |
| 2-naphthoic acid            | 4.2 <sup>20</sup>   |                        | 6.60 <sup>20</sup>  |                                            |
| QCy7                        | 4.5 <sup>21</sup>   |                        | -5.70 <sup>21</sup> |                                            |
| SulfoQcy7                   | 4.5 <sup>21</sup>   |                        | -4.60 <sup>21</sup> |                                            |
| Tetrasulfo-QCy7             | 4.5 <sup>21</sup>   |                        | -4.85 <sup>21</sup> |                                            |
| 7-hydroxy-4-methylflavylium | 4.45 <sup>22</sup>  |                        |                     | -0.70 <sup>22</sup>                        |
| BCyP                        | 6.5 <sup>23</sup>   |                        | -4.56 <sup>23</sup> |                                            |
| DPI                         | 12.8 <sup>24</sup>  |                        | 7.00 <sup>24</sup>  |                                            |
| protonated 6-Aminochrysene  | 3.15 <sup>25</sup>  | -3.40 <sup>25</sup>    | -3.26 <sup>25</sup> |                                            |
| 6-sulfonate-2-naphthol      | 9.1 <sup>26</sup>   |                        |                     | 1.95 <sup>26</sup>                         |

| Photoacids                                | Ground state<br>$pK_a$ | Fluorescence<br>titration | Förster cycle       | Time-<br>resolved<br>experiment |
|-------------------------------------------|------------------------|---------------------------|---------------------|---------------------------------|
| naphthalen-1-aminium                      | 3.9 <sup>27</sup>      |                           |                     | -1.00 <sup>27</sup>             |
| naphthalen-2-aminium                      | 4.1 <sup>27</sup>      |                           |                     | -0.80 <sup>27</sup>             |
| CBCyP                                     | 6.0 <sup>28</sup>      |                           | -7.50 <sup>28</sup> |                                 |
| 3HF                                       | 9.6 <sup>29</sup>      | -1.85 <sup>29</sup>       | 0.54 <sup>29</sup>  |                                 |
| Protonated DEA3HF                         | 3.25 <sup>29</sup>     |                           |                     |                                 |
| DEA3HF                                    | 10.54 <sup>29</sup>    | -1.89 <sup>29</sup>       | 1.23 <sup>29</sup>  |                                 |
| F3HF                                      | 10.33 <sup>29</sup>    | -2.25 <sup>29</sup>       | -2.42 <sup>29</sup> |                                 |
| Protonated 1H-phenanthro[9,10-d]imidazole | 4.65 <sup>30</sup>     | 2.20 <sup>30</sup>        | 2.26 <sup>30</sup>  |                                 |
| 1H-phenanthro[9,10-d]imidazole            | 11.86 <sup>30</sup>    | 11.66 <sup>30</sup>       | 7.95 <sup>30</sup>  |                                 |
| OG488 (N-A)                               | 3.61 <sup>31</sup>     |                           |                     | 3.14 <sup>31</sup>              |
| OG488 (C-N)                               | 1.02 <sup>31</sup>     |                           |                     | -1.79 <sup>31</sup>             |
| EG-dHONI                                  | 8.8 <sup>32</sup>      |                           | -1.20 <sup>32</sup> |                                 |
| COOH-dHONI                                | 8.8 <sup>32</sup>      |                           | -1.40 <sup>32</sup> |                                 |
| EG-SHONI                                  | 8.0 <sup>32</sup>      |                           | -1.90 <sup>32</sup> |                                 |
| HCD                                       | 5.4 <sup>33</sup>      |                           | -2.43 <sup>33</sup> |                                 |
| o-cyanophenol                             | 6.97 <sup>34</sup>     |                           | 0.50 <sup>34</sup>  | 0.66 <sup>34</sup>              |
| m-cyanophenol                             | 8.4 <sup>34</sup>      |                           | 2.20 <sup>34</sup>  | 1.89 <sup>34</sup>              |
| p-cyanophenol                             | 7.74 <sup>34</sup>     |                           | 3.20 <sup>34</sup>  | 3.33 <sup>34</sup>              |
| 3,4-dicyanophenol                         | 6.5 <sup>35</sup>      |                           | -0.90 <sup>35</sup> |                                 |
| phenol                                    | 10.0 <sup>36</sup>     | 3.70 <sup>37</sup>        | 4.00 <sup>36</sup>  |                                 |
| m-fluorophenol                            | 9.21 <sup>36</sup>     |                           | 3.80 <sup>36</sup>  |                                 |
| p-fluorophenol                            | 9.91 <sup>36</sup>     |                           | 4.40 <sup>36</sup>  |                                 |
| m-chlorophenol                            | 9.13 <sup>36</sup>     |                           | 3.00 <sup>36</sup>  |                                 |
| p-chlorophenol                            | 9.42 <sup>36</sup>     | 2.60 <sup>37</sup>        | 3.20 <sup>36</sup>  |                                 |
| m-bromophenol                             | 9.03 <sup>36</sup>     |                           | 2.80 <sup>36</sup>  |                                 |
| p-bromophenol                             | 9.36 <sup>36</sup>     |                           | 3.10 <sup>36</sup>  |                                 |
| m-methylphenol                            | 10.09 <sup>36</sup>    |                           | 4.00 <sup>36</sup>  |                                 |
| p-methylphenol                            | 10.26 <sup>36</sup>    | 3.71 <sup>37</sup>        | 4.30 <sup>36</sup>  |                                 |
| m-ethylphenol                             | 10.07 <sup>36</sup>    |                           | 4.10 <sup>36</sup>  |                                 |
| p-ethylphenol                             | 10.21 <sup>36</sup>    |                           | 4.30 <sup>36</sup>  |                                 |
| p-sulfonate-phenol                        | 9.03 <sup>36</sup>     |                           | 2.40 <sup>36</sup>  |                                 |
| p-trimethylaminophenol                    | 8.35 <sup>36</sup>     |                           | 1.70 <sup>36</sup>  |                                 |
| 5-bromo-8-hydroxyquinoline                |                        | -8.60 <sup>38</sup>       |                     |                                 |
| 5-sulfonate-8-hydroxyquinoline            |                        | -9.30 <sup>38</sup>       |                     |                                 |
| 5-thiocyano-8-hydroxyquinoline            |                        | -8.95 <sup>38</sup>       |                     |                                 |

| Photoacids                           | Ground state $pK_a$ | Fluorescence titration | Förster cycle | Time-resolved experiment |
|--------------------------------------|---------------------|------------------------|---------------|--------------------------|
| 7-fluoro-8-hydroxyquinoline          |                     | -9.40 <sup>38</sup>    |               |                          |
| 7-chloro-8-hydroxyquinoline          |                     | -9.20 <sup>38</sup>    |               |                          |
| 7-bromo-8-hydroxyquinoline           |                     | -8.65 <sup>38</sup>    |               |                          |
| 7-sulfonate-8-hydroxyquinoline       |                     | -9.15 <sup>38</sup>    |               |                          |
| 7-chloro-5-fluoro-8-hydroxyquinoline |                     | -8.80 <sup>38</sup>    |               |                          |
| 5,7-dichloro-8-hydroxyquinoline      |                     | -8.75 <sup>38</sup>    |               |                          |
| 5-bromo-7-chloro-8-hydroxyquinoline  |                     | -8.40 <sup>38</sup>    |               |                          |
| 7-bromo-5-fluoro-8-hydroxyquinoline  |                     | -8.60 <sup>38</sup>    |               |                          |
| 7-bromo-5-chloro-8-hydroxyquinoline  |                     | -8.55 <sup>38</sup>    |               |                          |
| 5,7-dibromo-8-hydroxyquinoline       |                     | -8.20 <sup>38</sup>    |               |                          |
| 5,7-disulfonate-8-hydroxyquinoline   |                     | -9.60 <sup>38</sup>    |               |                          |

<sup>a</sup>  $pK_a^*$  values are determined by the Debye-Smoluchowski equation. These values are not included in Figure 2c.

**Table S3.** Molecular structures of photoacids. (Proton in red is labile.)

| Coumarin 183                | HPTS                        | 2-naphthol               | 1-naphthol                 |
|-----------------------------|-----------------------------|--------------------------|----------------------------|
|                             |                             |                          |                            |
| 5-sulfonate-1-naphthol      | 3,6-disulfonate-1-naphthol  | 5-cyano-1-naphthol       | 5-tButyl-1-naphthol        |
|                             |                             |                          |                            |
| 5-cyano-2-naphthol          | 6-cyano-2-naphthol          | 7-cyano-2-naphthol       | 8-cyano-2-naphthol         |
|                             |                             |                          |                            |
| 5,8-dicyano-2-naphthol      | MHQ                         | QCy9                     | HPTS-derivative 1a         |
|                             |                             |                          |                            |
| HPTS-derivative 1b          | 5-amino-2-naphthol (N-A)    | 5-amino-2-naphthol (C-N) | 5-amino-2-naphthol (C-Z)   |
|                             |                             |                          |                            |
| 6-Carboxy-2-naphthol (OH)   | 6-Carboxy-2-naphthol (COOH) | 6-Carboxylate-2-naphthol | 6-Methylester-2-naphthol   |
|                             |                             |                          |                            |
| 2-naphthoic acid            | QCy7                        | SulfoQcy7                | Tetrasulfo-QCy7            |
|                             |                             |                          |                            |
| 7-hydroxy-4-methylflavylium | BCyP                        | DPI                      | protonated 6-Aminochrysene |
|                             |                             |                          |                            |

|                                           |                                |                      |                   |
|-------------------------------------------|--------------------------------|----------------------|-------------------|
|                                           |                                |                      |                   |
| 6-sulfonate-2-naphthol                    | naphthalen-1-aminium           | naphthalen-2-aminium | CBCyP             |
|                                           |                                |                      |                   |
| 3HF                                       | Protonated DEA3HF              | DEA3HF               | F3HF              |
|                                           |                                |                      |                   |
| Protonated 1H-phenanthro[9,10-d]imidazole | 1H-phenanthro[9,10-d]imidazole | OG488 (N-A)          | OG488 (C-N)       |
|                                           |                                |                      |                   |
| EG-dHONI                                  | COOH-dHONI                     | EG-SHONI             | HCD               |
|                                           |                                |                      |                   |
| o-cyanophenol                             | m-cyanophenol                  | p-cyanophenol        | 3,4-dicyanophenol |
|                                           |                                |                      |                   |
| phenol                                    | m-fluorophenol                 | p-fluorophenol       | m-chlorophenol    |
|                                           |                                |                      |                   |
| p-chlorophenol                            | m-bromophenol                  | p-bromophenol        | m-methylphenol    |

|                                                                                     |                                                                                     |                                                                                      |                                                                                      |
|-------------------------------------------------------------------------------------|-------------------------------------------------------------------------------------|--------------------------------------------------------------------------------------|--------------------------------------------------------------------------------------|
| 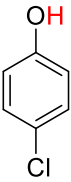   |    |     |   |
| p-methylphenol                                                                      | m-ethylphenol                                                                       | p-ethylphenol                                                                        | p-sulfonate-phenol                                                                   |
|    |    |     |   |
| p-trimethylaminophenol                                                              | 5-bromo-8-hydroxyquinoline                                                          | 5-sulfonate-8-hydroxyquinoline                                                       | 5-thiocyano-8-hydroxyquinoline                                                       |
|    |    |    |   |
| 7-fluoro-8-hydroxyquinoline                                                         | 7-chloro-8-hydroxyquinoline                                                         | 7-bromo-8-hydroxyquinoline                                                           | 7-sulfonate-8-hydroxyquinoline                                                       |
|   |   |   |  |
| 7-chloro-5-fluoro-8-hydroxyquinoline                                                | 5,7-dichloro-8-hydroxyquinoline                                                     | 5-bromo-7-chloro-8-hydroxyquinoline                                                  | 7-bromo-5-fluoro-8-hydroxyquinoline                                                  |
|  |  |  |                                                                                      |
| 7-bromo-5-chloro-8-hydroxyquinoline                                                 | 5,7-dibromo-8-hydroxyquinoline                                                      | 5,7-disulfonate-8-hydroxyquinoline                                                   |                                                                                      |
|  |  |  |                                                                                      |



**Table S4.** DFT-calculated  $\Delta G$  and  $pK_a$  values of photoacids in the ground state,  $pK_a(\text{Calc.}) = k\Delta G + C$ .

| Photoacids                                  | $\Delta G$ (kJ/mol) | $pK_a$ (Expt.)      | $pK_a$ (Calc.) | Error |
|---------------------------------------------|---------------------|---------------------|----------------|-------|
| Coumarin 183                                | 1170.1              | 5.5 <sup>1-3</sup>  | 5.94           | 0.44  |
| HPTS                                        | 1182.6              | 7.7 <sup>4</sup>    | 7.10           | -0.60 |
| 2-naphthol                                  | 1208.6              | 9.45 <sup>6</sup>   | 9.52           | 0.07  |
| 1-naphthol                                  | 1202.7              | 9.4 <sup>9</sup>    | 8.97           | -0.43 |
| 5-sulfonate-1-naphthol                      | 1190.3              | 8.4 <sup>13</sup>   | 7.82           | -0.58 |
| 3,6-disulfonate-1-naphthol                  | 1188.1              | 8.6 <sup>13</sup>   | 7.62           | -0.98 |
| 5-cyano-1-naphthol                          | 1194.6              | 8.05 <sup>14</sup>  | 8.21           | 0.16  |
| 5-tButyl-1-naphthol                         | 1203.5              | 9.8 <sup>13</sup>   | 9.04           | -0.76 |
| 5-cyano-2-naphthol                          | 1202.4              | 8.75 <sup>6</sup>   | 8.94           | 0.19  |
| 6-cyano-2-naphthol                          | 1197.7              | 8.4 <sup>6</sup>    | 8.50           | 0.10  |
| 7-cyano-2-naphthol                          | 1202.4              | 8.75 <sup>6</sup>   | 8.94           | 0.19  |
| 8-cyano-2-naphthol                          | 1198.1              | 8.35 <sup>6</sup>   | 8.54           | 0.19  |
| 5,8-dicyano-2-naphthol                      | 1191.9              | 7.8 <sup>6</sup>    | 7.97           | 0.17  |
| MHQ                                         | 1189.2              |                     | 7.71           |       |
| QCy9                                        | 1157.4              | 4.3 <sup>17</sup>   | 4.77           | 0.47  |
| HPTS-derivative 1a                          | 1157.1              | 4.4 <sup>18</sup>   | 4.75           | 0.35  |
| HPTS-derivative 1b                          | 1148.5              | 5.7 <sup>18</sup>   | 3.95           | -1.75 |
| 5-amino-2-naphthol (N-A)                    | 1210.7              | 9.5 <sup>19</sup>   | 9.70           | 0.20  |
| 5-amino-2-naphthol (C-N)                    | 1145.2              | 4.0 <sup>19</sup>   | 3.64           | -0.36 |
| 5-amino-2-naphthol (C-Z)                    | 1201.7              |                     | 8.87           |       |
| 6-Carboxy-2-naphthol (OH)                   | 1199.8              | 8.9 <sup>20</sup>   | 8.69           | -0.21 |
| 6-Carboxy-2-naphthol (COOH)                 | 1160.7              | 4.3 <sup>20</sup>   | 5.08           | 0.78  |
| 6-Carboxylate-2-naphthol                    | 1204.7              | 9.5 <sup>20</sup>   | 9.15           | -0.35 |
| 6-Methylester-2-naphthol                    | 1200.4              | 8.6 <sup>20</sup>   | 8.76           | 0.16  |
| 2-naphthoic acid                            | 1158.6              | 4.2 <sup>20</sup>   | 4.88           | 0.68  |
| QCy7                                        | 1158.4              | 4.5 <sup>21</sup>   | 4.87           | 0.37  |
| SulfoQcy7                                   | 1119.9              | 4.5 <sup>21</sup>   | 1.30           | -3.20 |
| Tetrasulfo-QCy7                             | 1155.2              | 4.5 <sup>21</sup>   | 4.56           | 0.06  |
| 7-hydroxy-4-methylflavylium                 | 1162.1              | 4.45 <sup>22</sup>  | 5.21           | 0.76  |
| BCyP                                        | 1211.7              | 6.5 <sup>23</sup>   | 9.80           | 3.30  |
| DPI                                         | 1225.8              | 12.8 <sup>24</sup>  | 11.10          | -1.70 |
| protonated 6-Aminochrysene                  | 1144.1              | 3.15 <sup>25</sup>  | 3.54           | 0.39  |
| 6-sulfonate-2-naphthol                      | 1200.8              | 9.1 <sup>26</sup>   | 8.79           | -0.31 |
| naphthalen-1-aminium                        | 1146.6              | 3.9 <sup>27</sup>   | 3.77           | -0.13 |
| naphthalen-2-aminium                        | 1143.6              | 4.1 <sup>27</sup>   | 3.49           | -0.61 |
| CBCyP                                       | 1197.8              | 6.0 <sup>28</sup>   | 8.51           | 2.51  |
| 3HF                                         | 1204.0              | 9.6 <sup>29</sup>   | 9.09           | -0.51 |
| Protonated DEA3HF                           | 1166.6              | 3.25 <sup>29</sup>  | 5.62           | 2.37  |
| DEA3HF                                      | 1211.2              | 10.54 <sup>29</sup> | 9.75           | -0.79 |
| F3HF                                        | 1201.8              | 10.33 <sup>29</sup> | 8.88           | -1.45 |
| Protonated 1H-phenanthro [9,10-d] imidazole | 1156.5              | 4.65 <sup>30</sup>  | 4.68           | 0.03  |
| 1H-phenanthro[9,10-d] imidazole             | 1220.7              | 11.86 <sup>30</sup> | 10.64          | -1.22 |

| Photoacids                           | $\Delta G$ (kJ/mol) | $pK_a$ (Expt.)      | $pK_a$ (Calc.) | Error |
|--------------------------------------|---------------------|---------------------|----------------|-------|
| OG488 (N-A)                          | 1160.6              | 3.61 <sup>31</sup>  | 5.07           | 1.46  |
| OG488 (C-N)                          | 1131.4              | 1.02 <sup>31</sup>  | 2.36           | 1.34  |
| EG-dHONI                             | 1197.6              | 8.8 <sup>32</sup>   | 8.49           | -0.31 |
| COOH-dHONI                           | 1193.0              | 8.8 <sup>32</sup>   | 8.07           | -0.73 |
| EG-SHONI                             | 1192.0              | 8.0 <sup>32</sup>   | 7.97           | -0.03 |
| HCD                                  | 1179.0              | 5.4 <sup>33</sup>   | 6.77           | 1.37  |
| o-cyanophenol                        | 1175.3              | 6.97 <sup>34</sup>  | 6.43           | -0.54 |
| m-cyanophenol                        | 1198.2              | 8.4 <sup>34</sup>   | 8.55           | 0.21  |
| p-cyanophenol                        | 1189.0              | 7.74 <sup>34</sup>  | 7.70           | -0.04 |
| 3,4-dicyanophenol                    | 1175.0              | 6.5 <sup>35</sup>   | 6.40           | -0.10 |
| phenol                               | 1211.9              | 10.0 <sup>36</sup>  | 9.82           | -0.18 |
| m-fluorophenol                       | 1202.1              | 9.21 <sup>36</sup>  | 8.91           | -0.30 |
| p-fluorophenol                       | 1210.6              | 9.91 <sup>36</sup>  | 9.70           | -0.21 |
| m-chlorophenol                       | 1201.4              | 9.13 <sup>36</sup>  | 8.85           | -0.28 |
| p-chlorophenol                       | 1205.4              | 9.42 <sup>36</sup>  | 9.22           | -0.20 |
| m-bromophenol                        | 1202.8              | 9.03 <sup>36</sup>  | 8.97           | -0.06 |
| p-bromophenol                        | 1205.9              | 9.36 <sup>36</sup>  | 9.26           | -0.10 |
| m-methylphenol                       | 1212.7              | 10.09 <sup>36</sup> | 9.89           | -0.20 |
| p-methylphenol                       | 1220.1              | 10.26 <sup>36</sup> | 10.58          | 0.32  |
| m-ethylphenol                        | 1220.2              | 10.07 <sup>36</sup> | 10.59          | 0.52  |
| p-ethylphenol                        | 1221.4              | 10.21 <sup>36</sup> | 10.70          | 0.49  |
| p-sulfonate-phenol                   | 1198.3              | 9.03 <sup>36</sup>  | 8.56           | -0.47 |
| p-trimethylaminophenol               | 1199.5              | 8.35 <sup>36</sup>  | 8.67           | 0.32  |
| 5-bromo-8-hydroxyquinoline           | 1161.4              |                     | 5.14           |       |
| 5-sulfonate-8-hydroxyquinoline       | 1153.5              |                     | 4.41           |       |
| 5-thiocyano-8-hydroxyquinoline       | 1141.7              |                     | 3.31           |       |
| 7-fluoro-8-hydroxyquinoline          | 1158.2              |                     | 4.85           |       |
| 7-chloro-8-hydroxyquinoline          | 1150.1              |                     | 4.09           |       |
| 7-bromo-8-hydroxyquinoline           | 1149.9              |                     | 4.07           |       |
| 7-sulfonate-8-hydroxyquinoline       | 1169.9              |                     | 5.93           |       |
| 7-chloro-5-fluoro-8-hydroxyquinoline | 1147.6              |                     | 3.86           |       |
| 5,7-dichloro-8-hydroxyquinoline      | 1140.0              |                     | 3.16           |       |
| 5-bromo-7-chloro-8-hydroxyquinoline  | 1139.1              |                     | 3.07           |       |
| 7-bromo-5-fluoro-8-hydroxyquinoline  | 1146.0              |                     | 3.71           |       |
| 7-bromo-5-chloro-8-hydroxyquinoline  | 1137.7              |                     | 2.95           |       |
| 5,7-dibromo-8-hydroxyquinoline       | 1136.0              |                     | 2.79           |       |
| 5,7-disulfonate-8-hydroxyquinoline   | 1152.0              |                     | 4.27           |       |

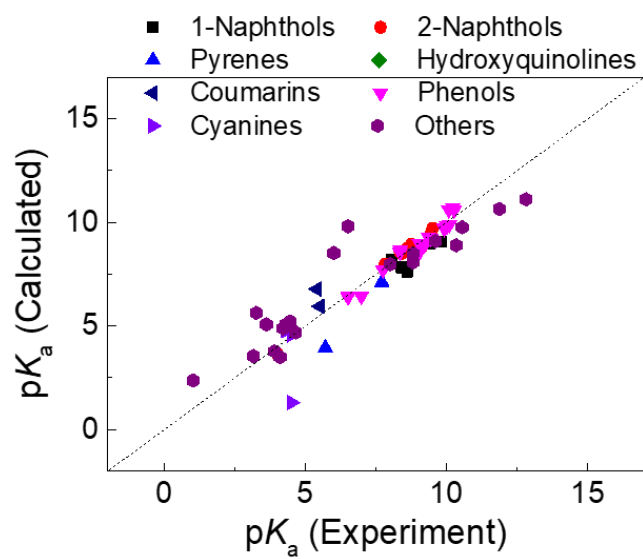

**Figure S1.** Experimental and calculated  $pK_a$  values. Calculated  $pK_a$  values were obtained using DFT-calculated  $\Delta G$  in Eq. (4). The mean absolute error is 0.62  $pK_a$  units.

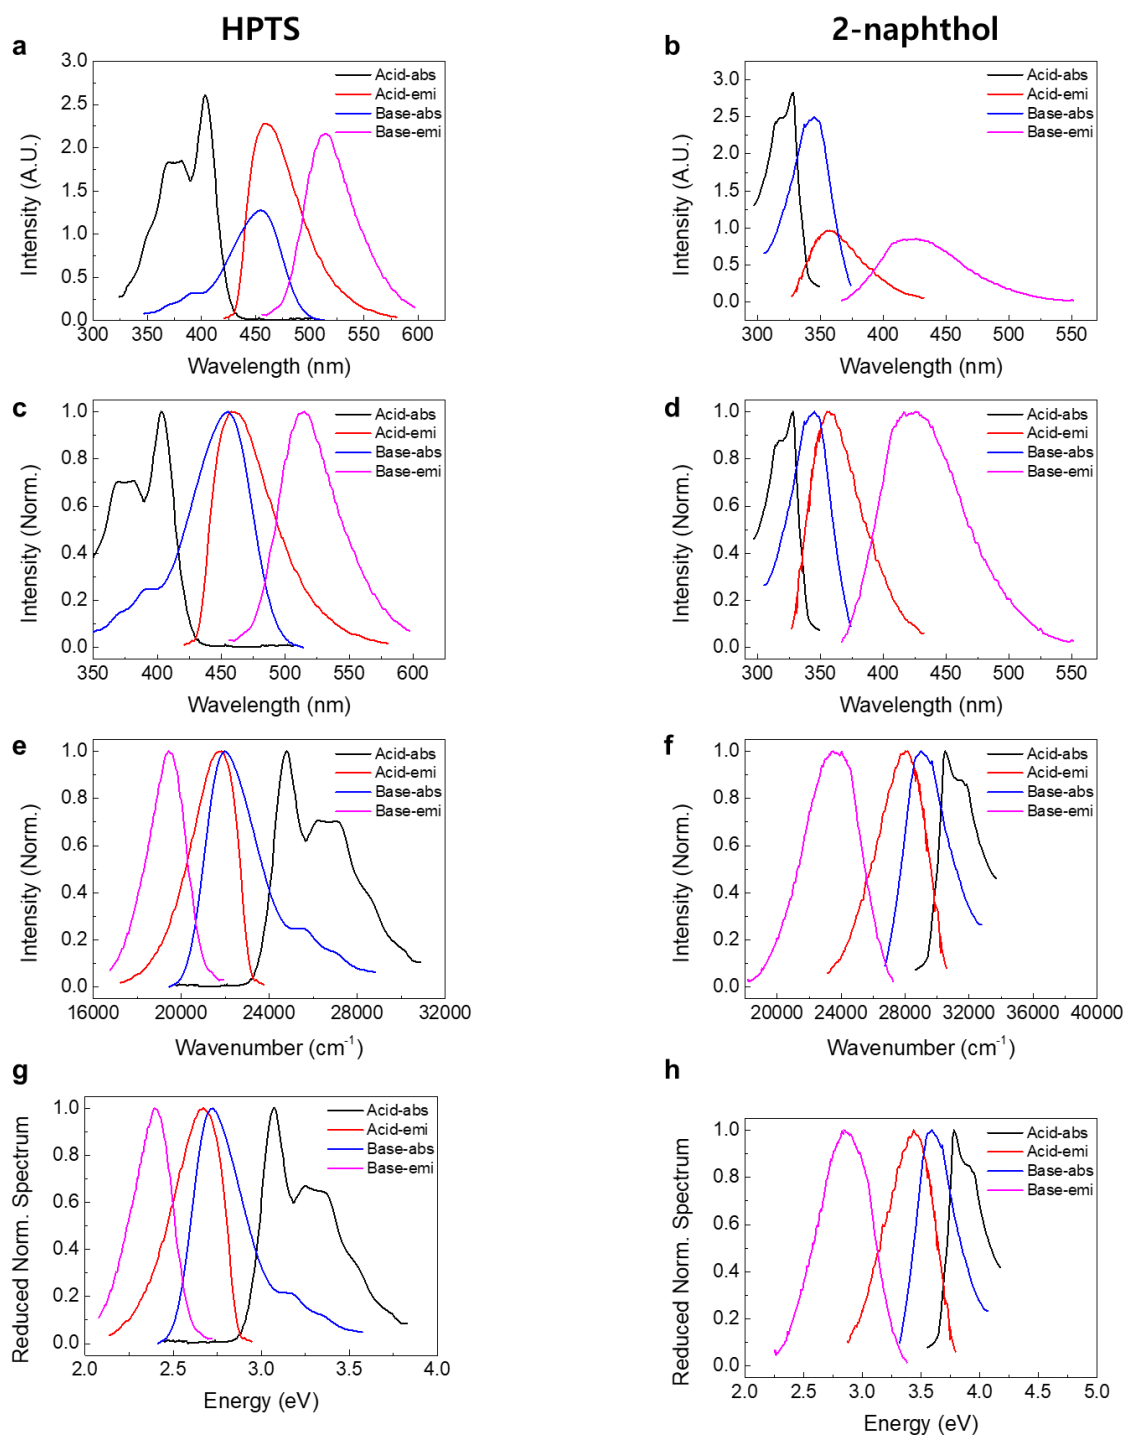

**Figure S2.** The absorption and emission spectra of acidic and basic forms of photoacids. (**a** and **b**) Raw spectra, (**c** and **d**) the normalized spectra in wavelength, (**e** and **f**) the normalized spectra in wavenumber, and (**g** and **h**) the reduced normalized spectra of HPTS and 2-naphthol.

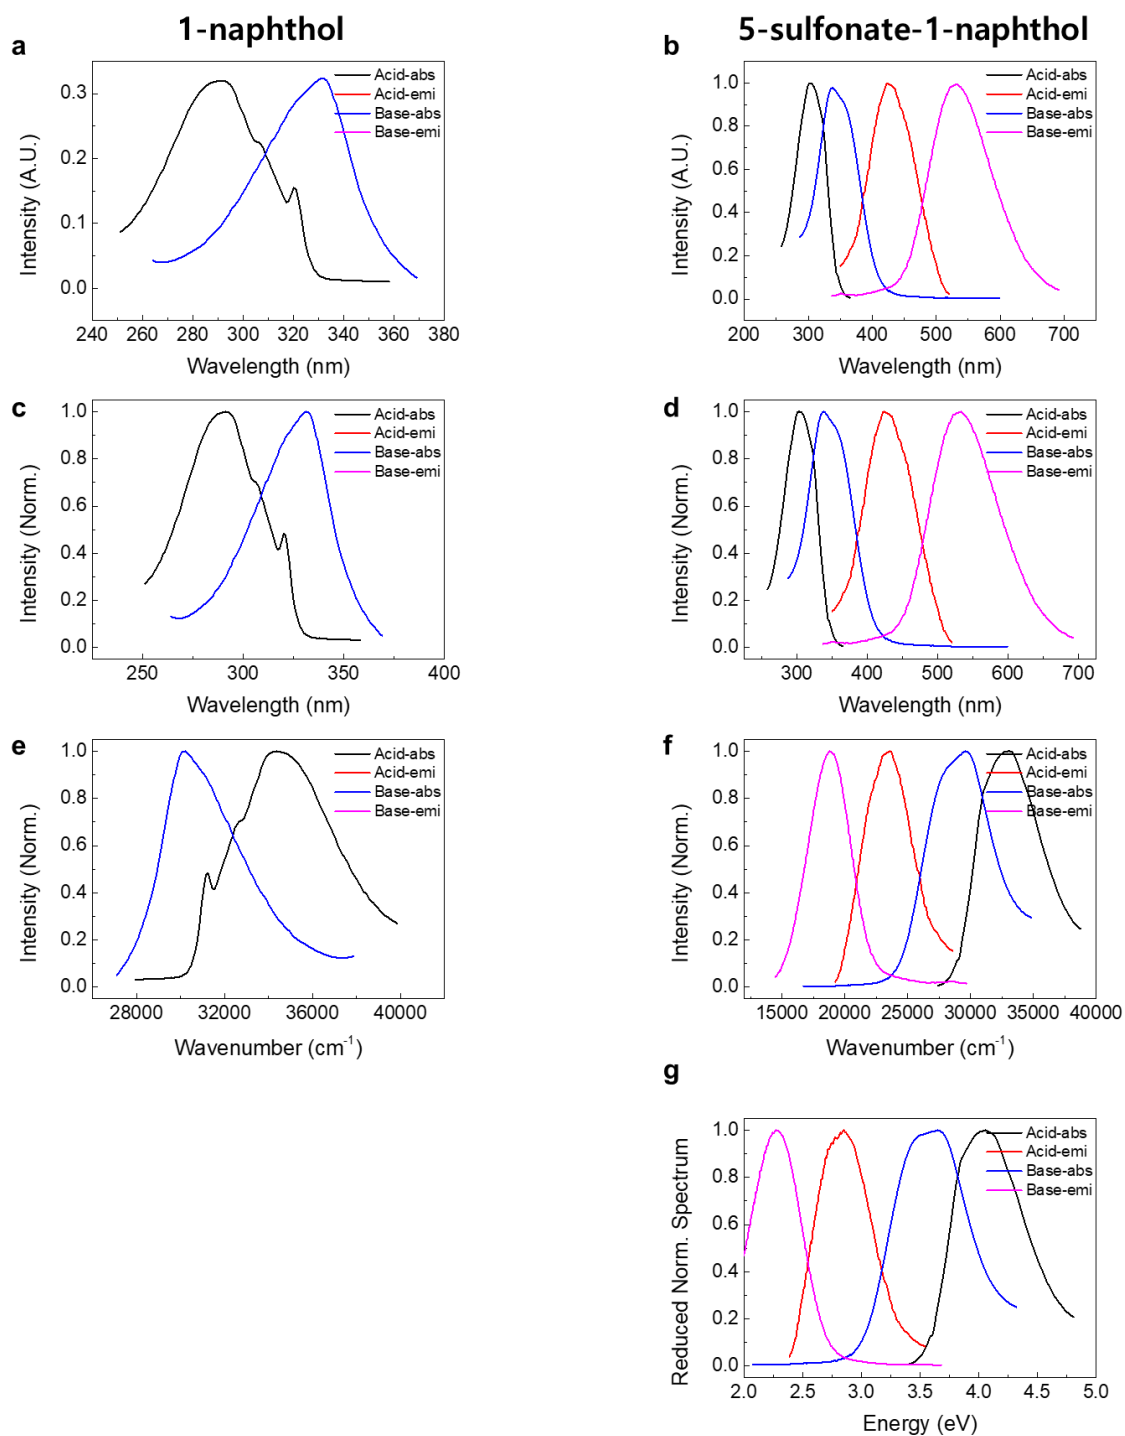

**Figure S3.** The absorption and emission spectra of acidic and basic forms of photoacids. (**a** and **b**) Raw spectra, (**c** and **d**) the normalized spectra in wavelength, (**e** and **f**) the normalized spectra in wavenumber, and (**g**) the reduced normalized spectra of 1-naphthol and 5-sulfonate-1-naphthol.

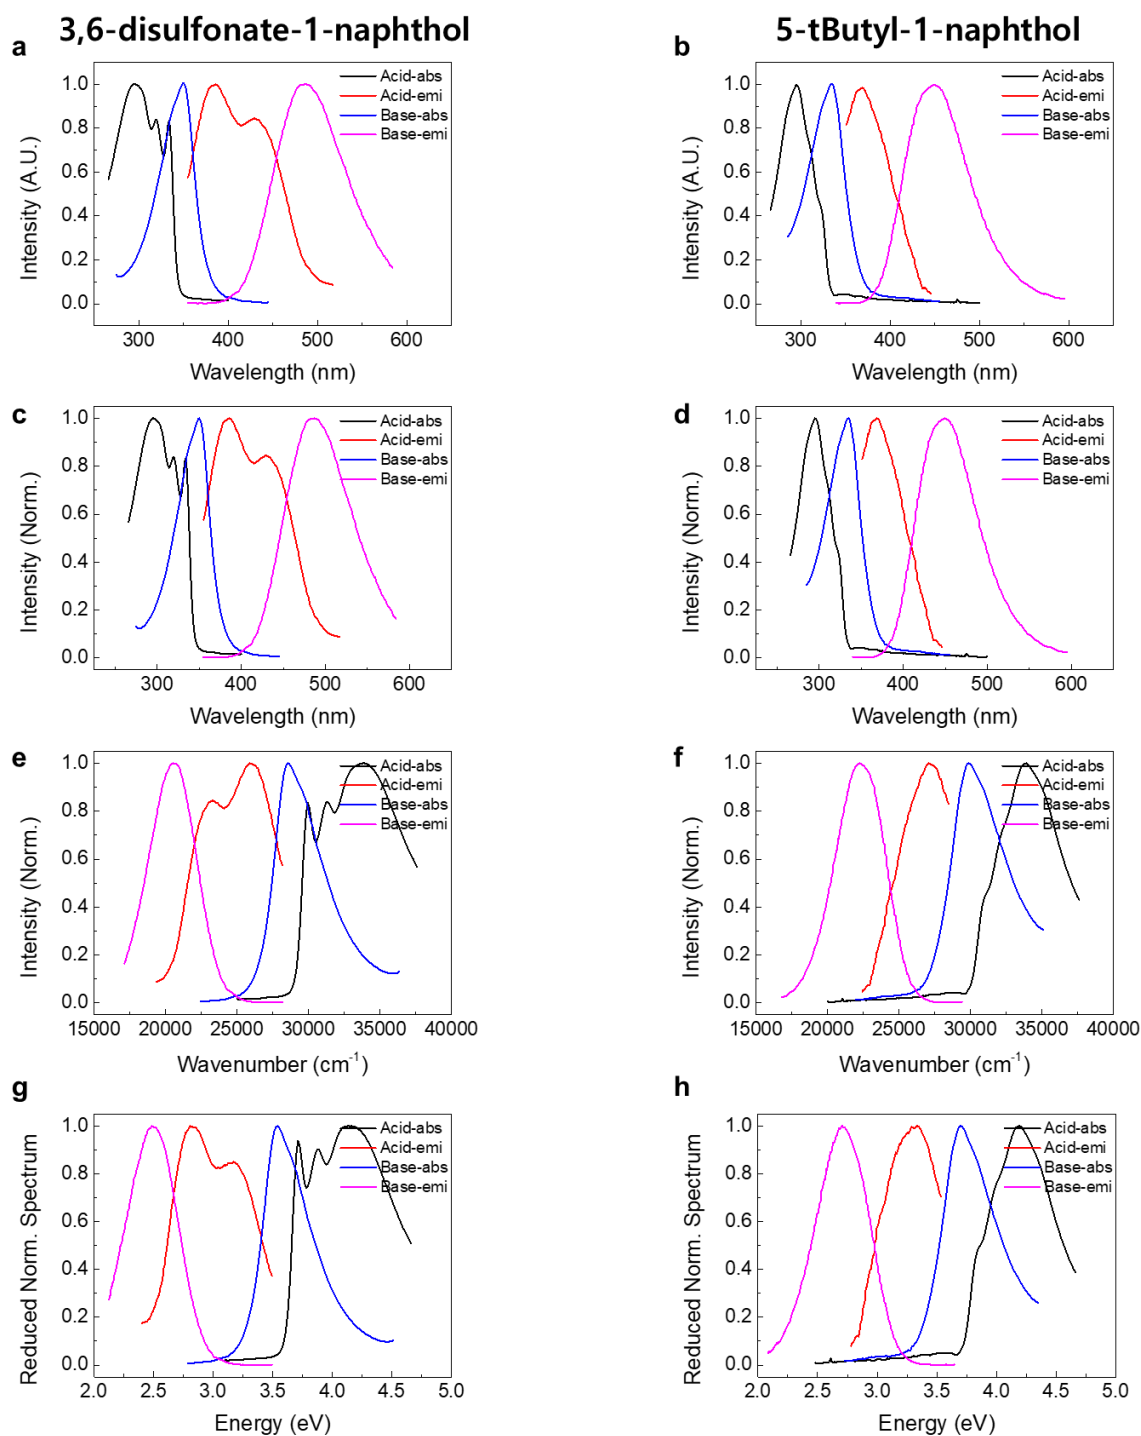

**Figure S4.** The absorption and emission spectra of acidic and basic forms of photoacids. (**a** and **b**) Raw spectra, (**c** and **d**) the normalized spectra in wavelength, (**e** and **f**) the normalized spectra in wavenumber, and (**g** and **h**) the reduced normalized spectra of 3,6-disulfonate-1-naphthol and 5-tButyl-1-naphthol.

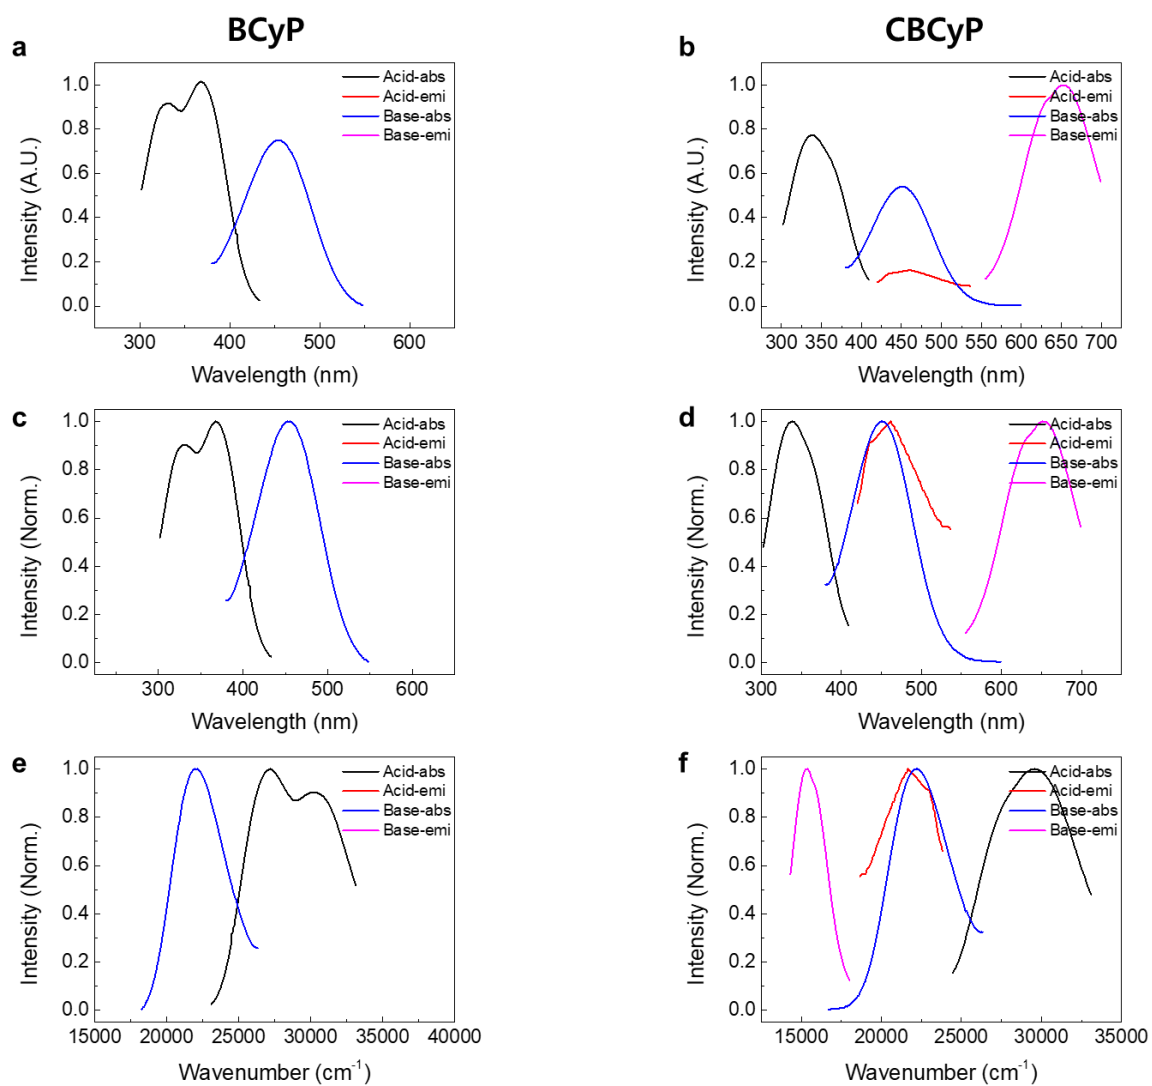

**Figure S5.** The absorption and emission spectra of acidic and basic forms of photoacids. (a and b) Raw spectra, (c and d) the normalized spectra in wavelength, and (e and f) the normalized spectra in wavenumber of BCyP and CBCyP.

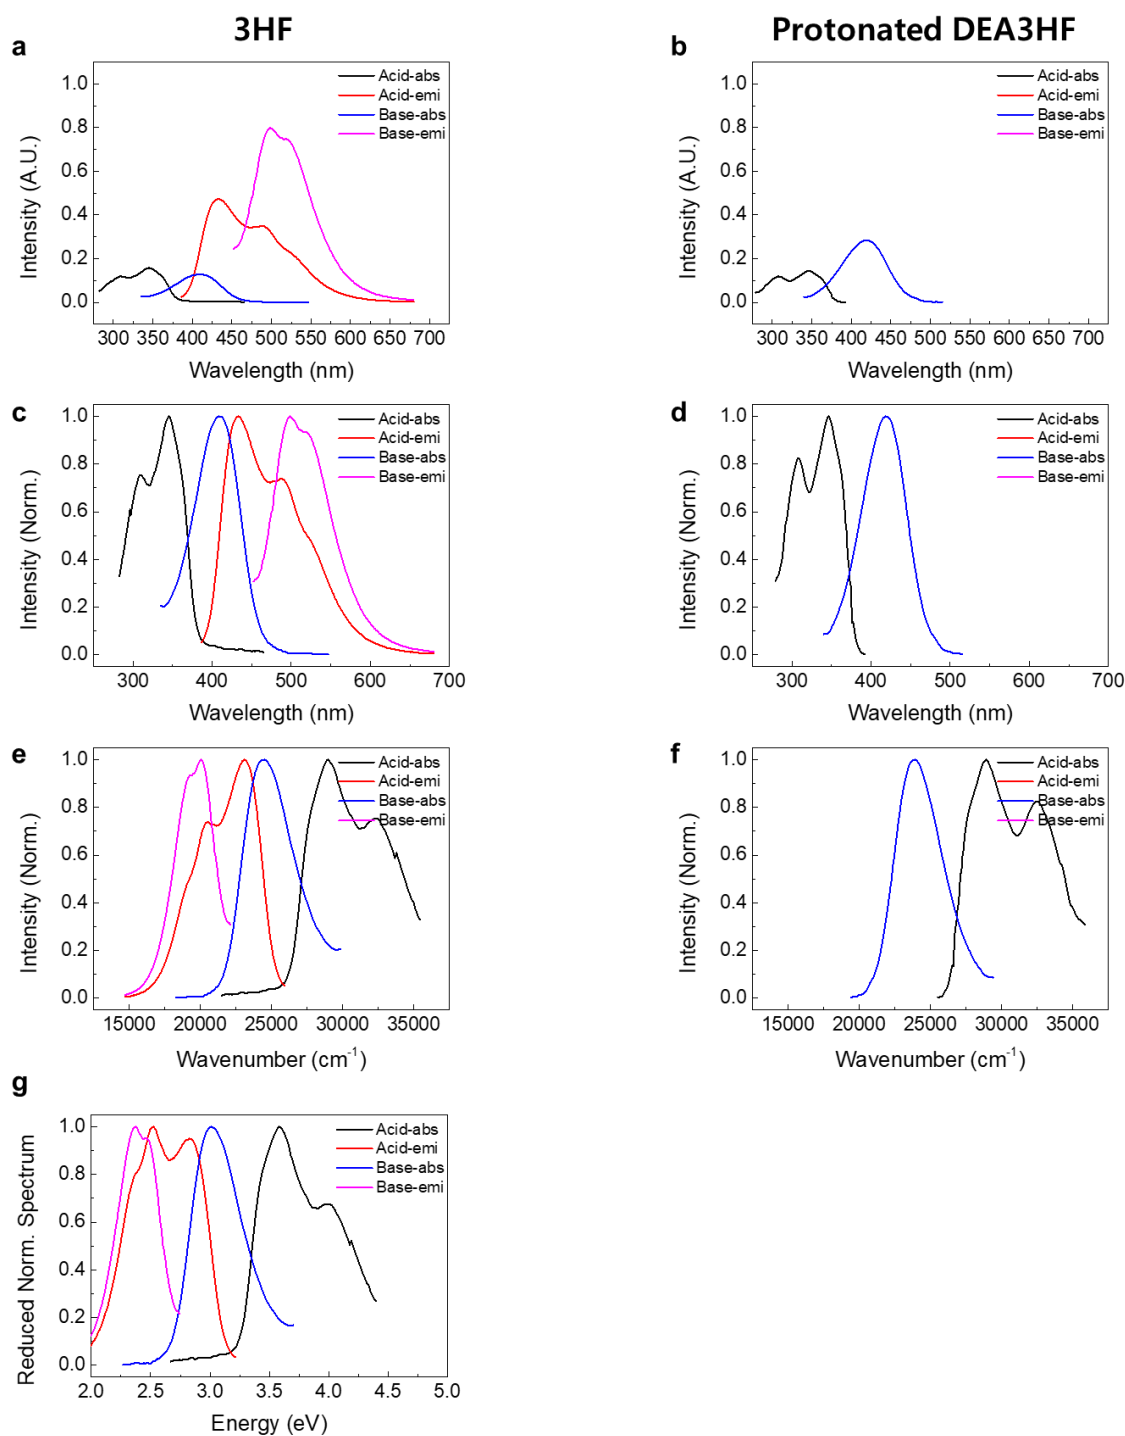

**Figure S6.** The absorption and emission spectra of acidic and basic forms of photoacids. (**a** and **b**) Raw spectra, (**c** and **d**) the normalized spectra in wavelength, (**e** and **f**) the normalized spectra in wavenumber, and (**g**) the reduced normalized spectra of 3HF and Protonated DEA3HF.



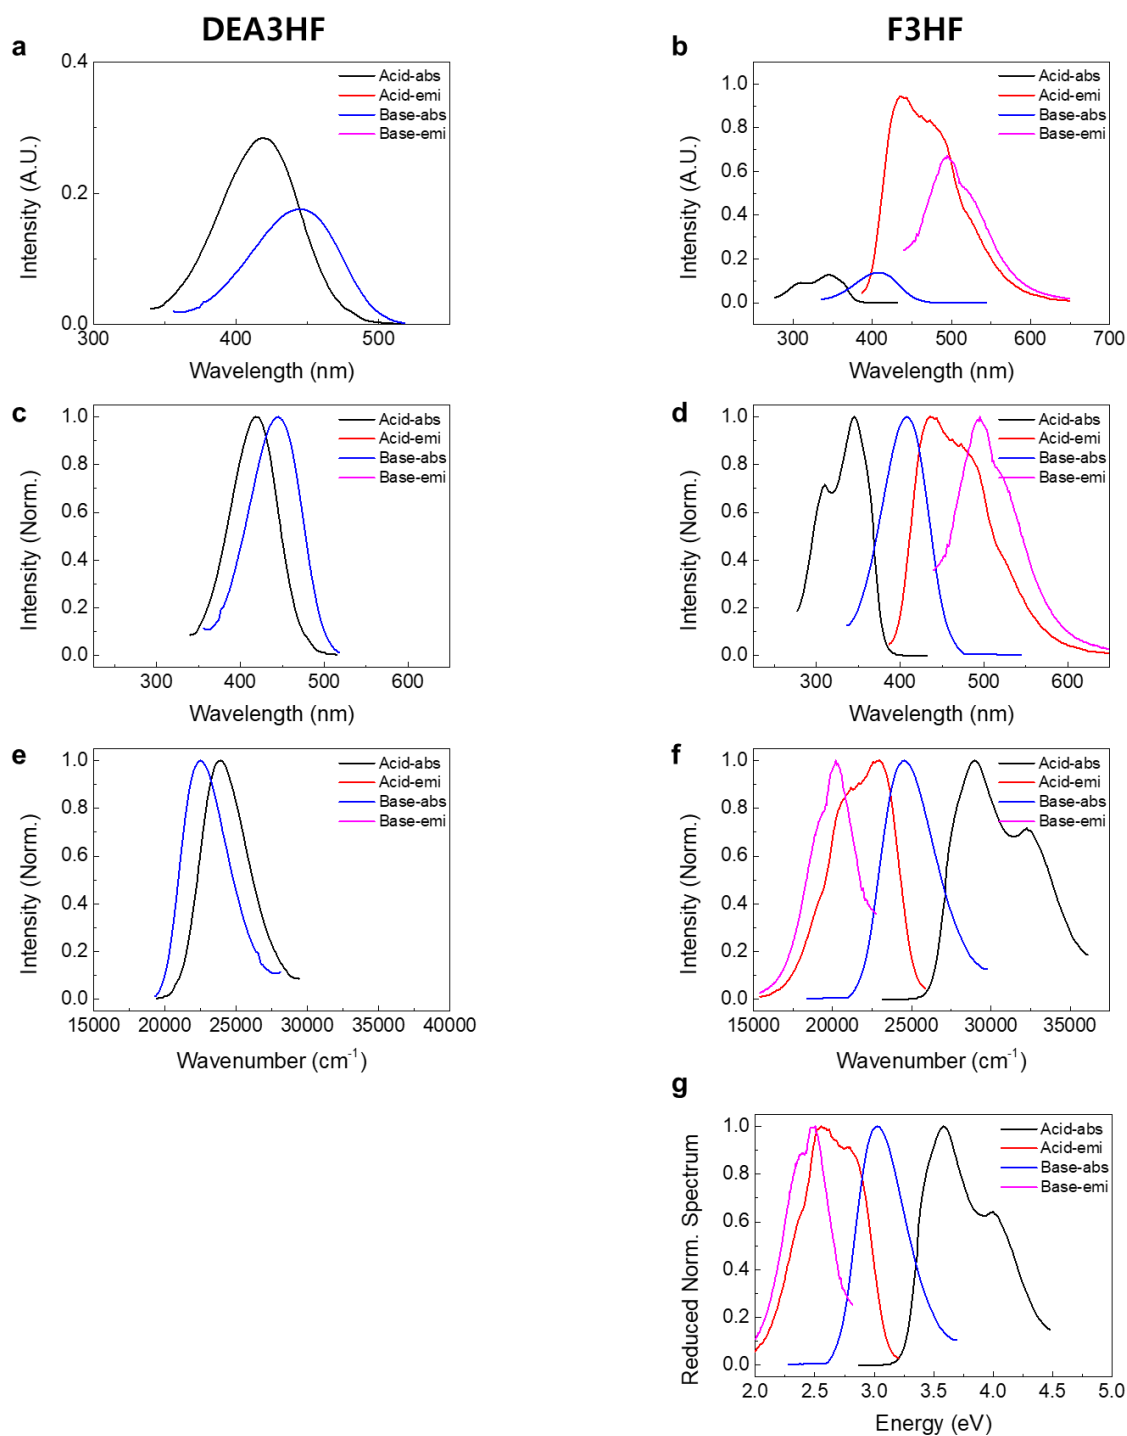

**Figure S7.** The absorption and emission spectra of acidic and basic forms of photoacids. (**a** and **b**) Raw spectra, (**c** and **d**) the normalized spectra in wavelength, (**e** and **f**) the normalized spectra in wavenumber, and (**g**) the reduced normalized spectra of DEA3HF and F3HF.

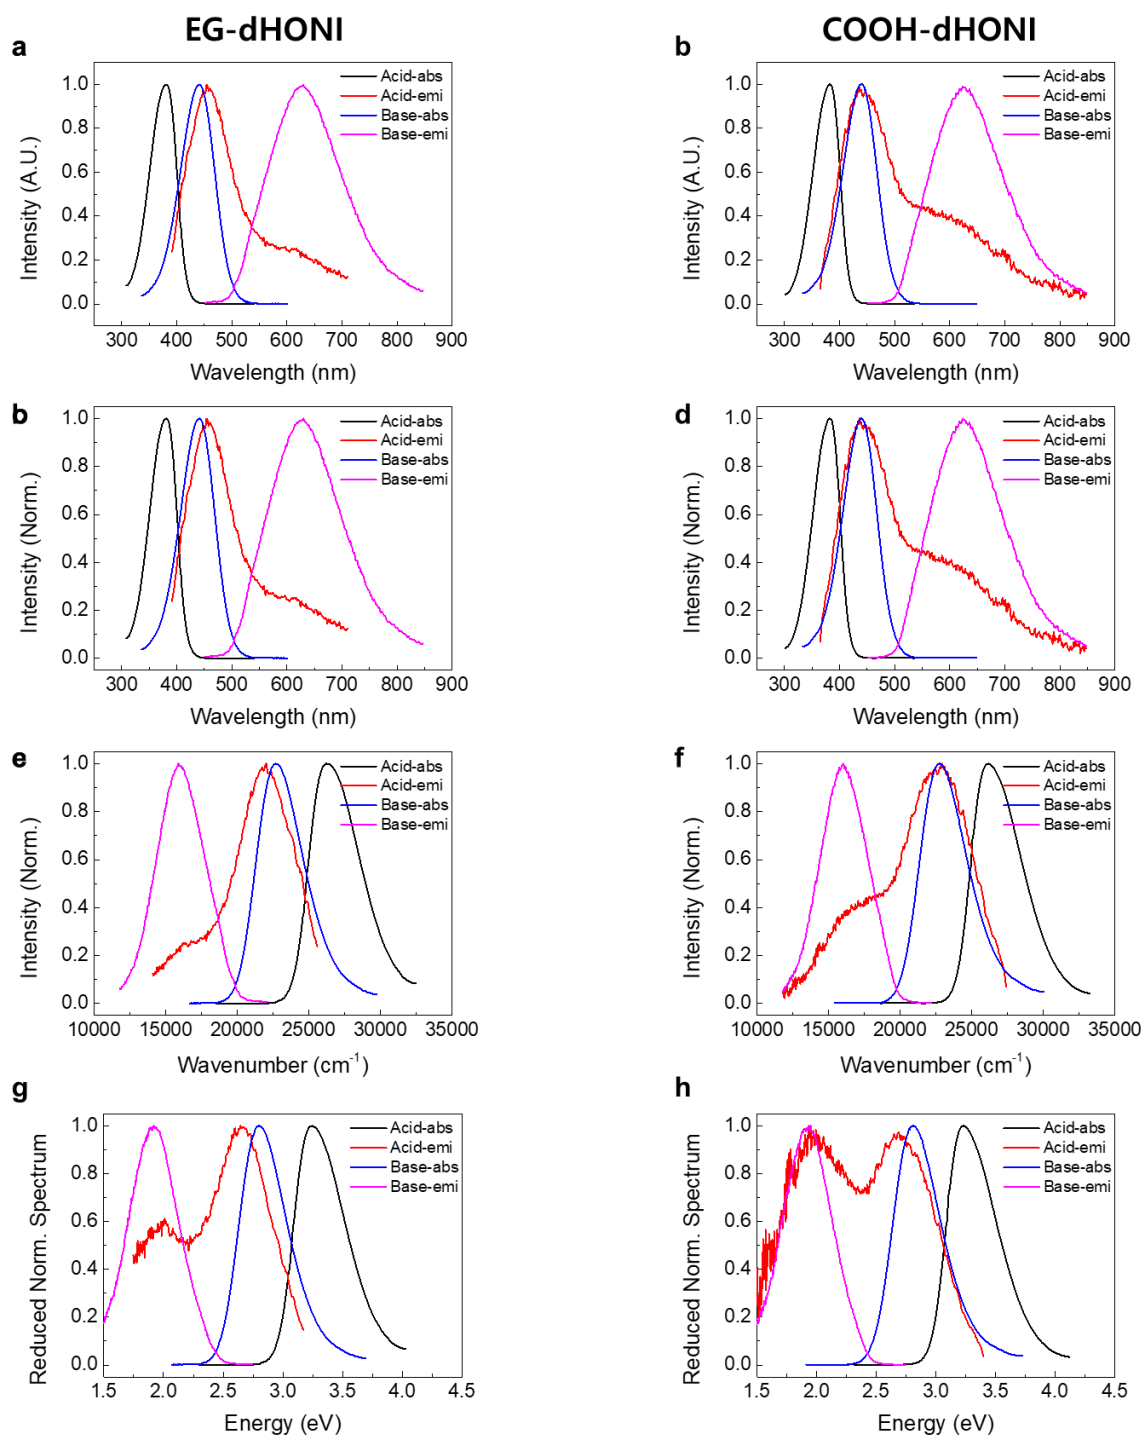

**Figure S8.** The absorption and emission spectra of acidic and basic forms of photoacids. (a and b) Raw spectra, (c and d) the normalized spectra in wavelength, (e and f) the normalized spectra in wavenumber, and (g and h) the reduced normalized spectra of EG-dHONI and COOH-dHONI.

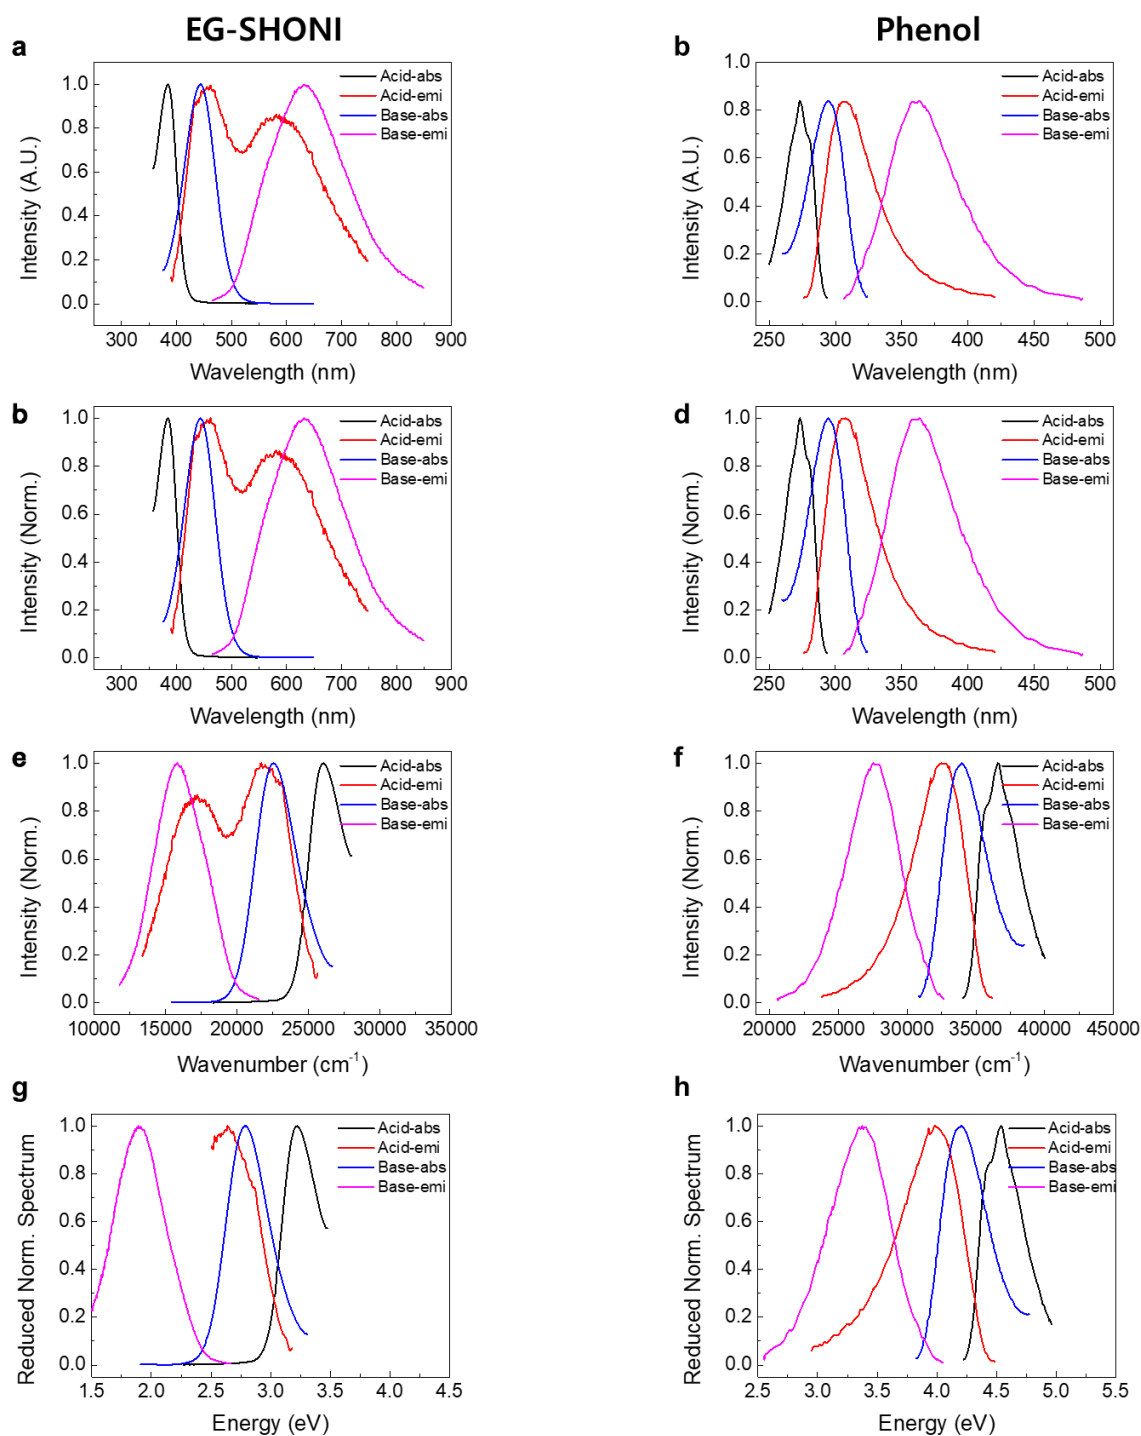

**Figure S9.** The absorption and emission spectra of acidic and basic forms of photoacids. (**a** and **b**) Raw spectra, (**c** and **d**) the normalized spectra in wavelength, (**e** and **f**) the normalized spectra in wavenumber, and (**g** and **h**) the reduced normalized spectra of EG-SHONI and phenol.

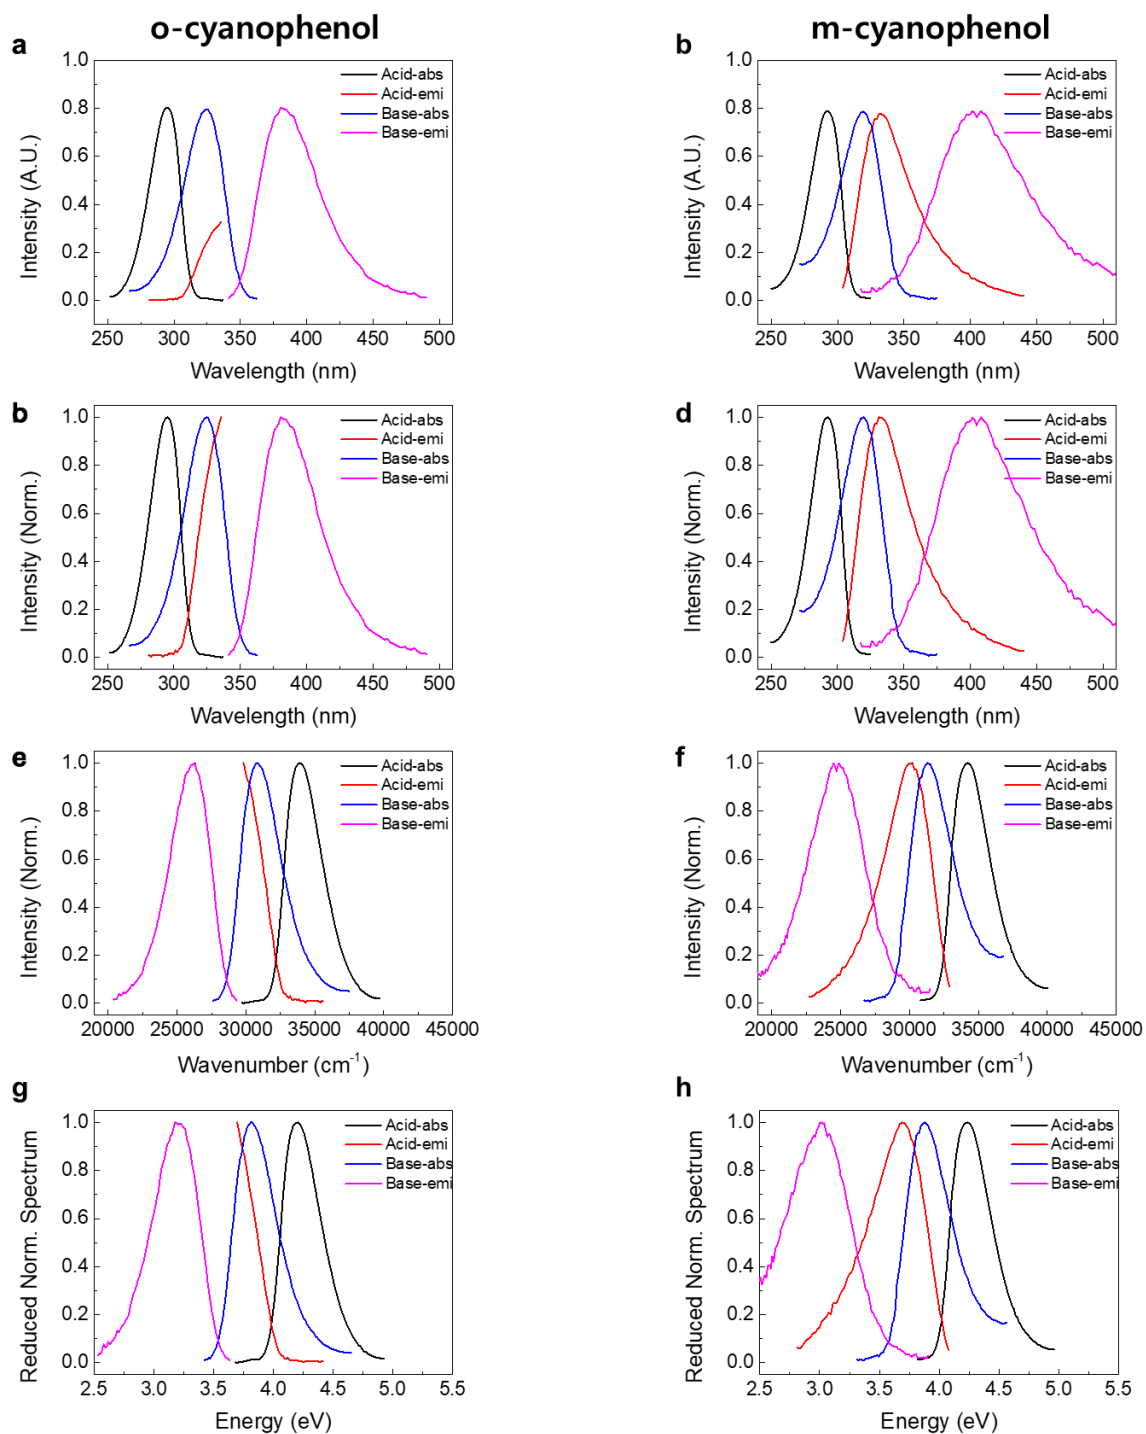

**Figure S10.** The absorption and emission spectra of acidic and basic forms of photoacids. (**a** and **b**) Raw spectra, (**c** and **d**) the normalized spectra in wavelength, (**e** and **f**) the normalized spectra in wavenumber, and (**g** and **h**) the reduced normalized spectra of o-cyanophenol and m-cyanophenol.

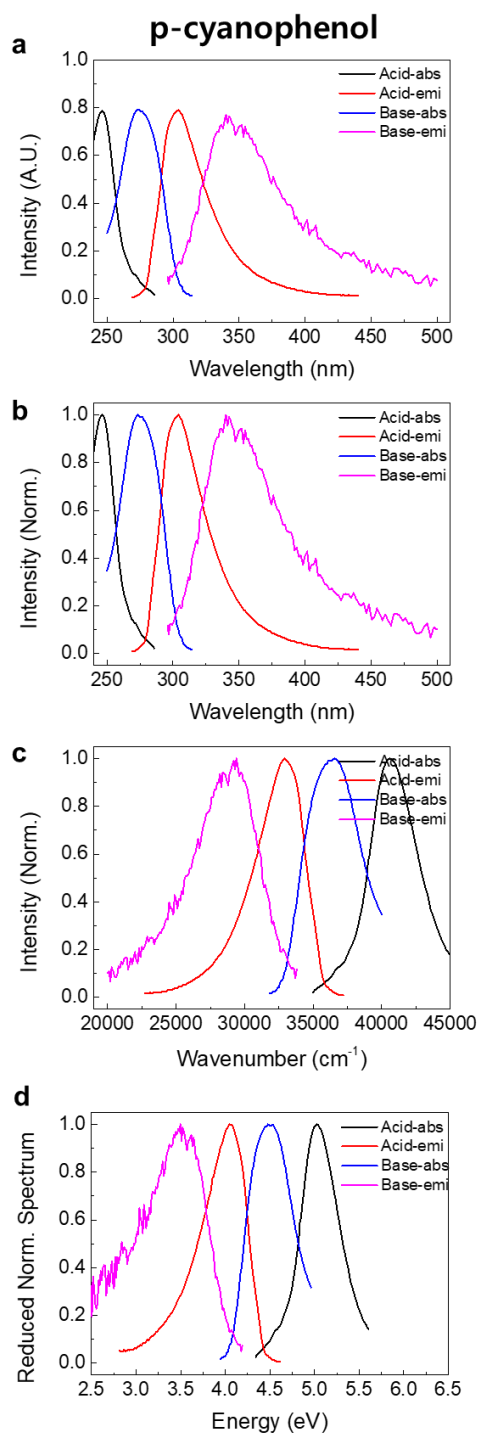

**Figure S11.** The absorption and emission spectra of acidic and basic forms of p-cyanophenol. (a) Raw spectra, (b) the normalized spectra in wavelength, (c) the normalized spectra in wavenumber, and (d) the reduced normalized spectra of p-cyanophenol.

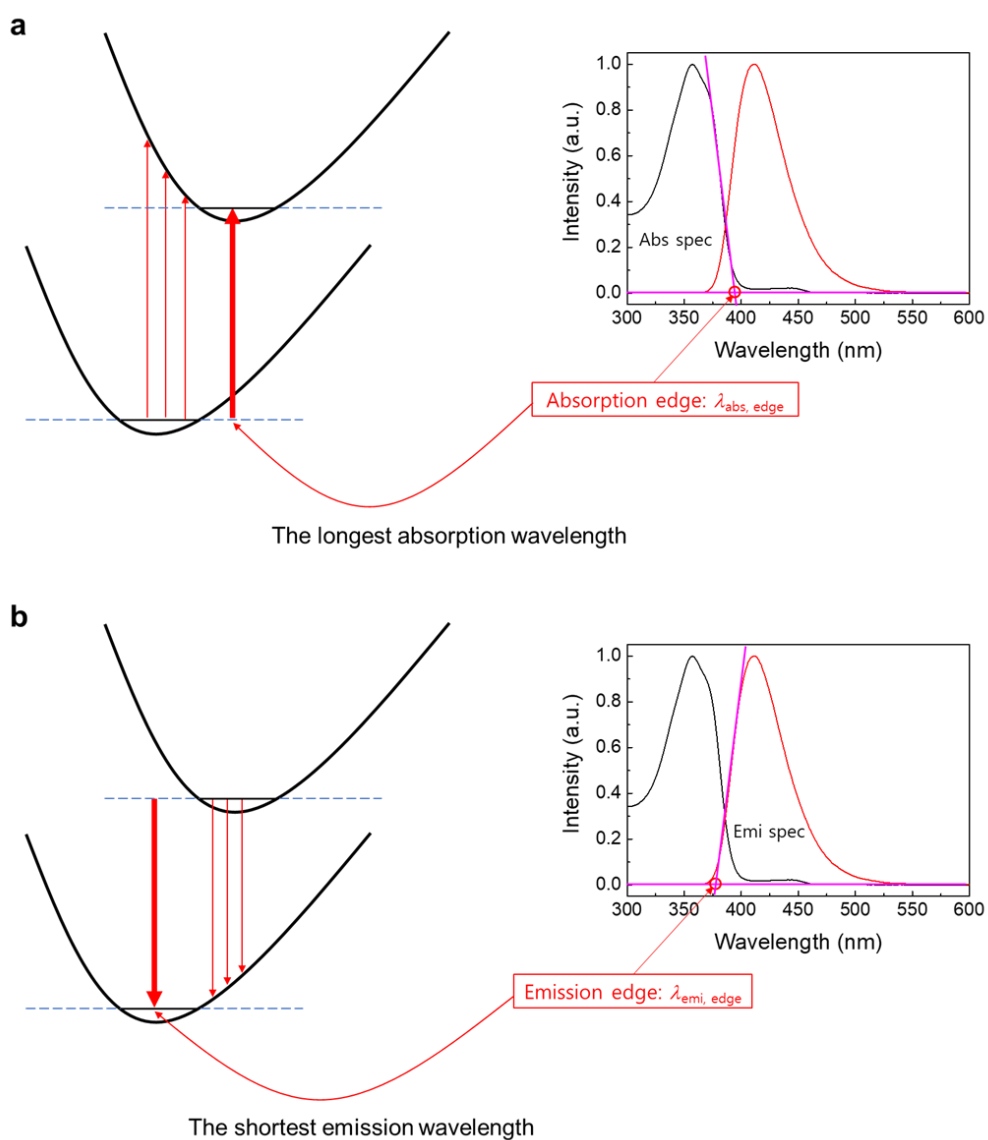

**Figure S12.** Schematic of obtaining (a) the absorption edge and (b) the emission edge from absorption and emission spectra.

**Table S5.** The wavelengths (nm) corresponding to the maximum (Max), absorption edge (Abs. edge), emission edge (Emi. edge), the first moment (Mom.), and crossing point (Cross).

| Photoacids                 | Acidic form |           |           |           |           |           |       | Basic form |           |           |           |           |           |       |
|----------------------------|-------------|-----------|-----------|-----------|-----------|-----------|-------|------------|-----------|-----------|-----------|-----------|-----------|-------|
|                            | Abs. Max.   | Abs. edge | Abs. Mom. | Emi. Max. | Emi. edge | Emi. Mom. | Cross | Abs. Max.  | Abs. edge | Abs. Mom. | Emi. Max. | Emi. edge | Emi. Mom. | Cross |
| Coumarin 183               | 357.0       | 393.2     | 366.6     | 410.8     | 378.7     | 424.4     | 387.0 | 443.0      | 462.7     | 401.2     | 451.0     | 424.6     | 466.8     | 447.8 |
| HPTS                       | 403.0       | 426.9     | 383.8     | 458.0     | 429.5     | 476.6     | 430.0 | 455.0      | 495.6     | 439.5     | 515.0     | 474.7     | 523.6     | 485.0 |
| 2-naphthol                 | 328.0       | 340.7     | 318.9     | 355.0     | 326.5     | 367.7     | 336.0 | 345.0      | 374.2     | 339.7     | 426.0     | 371.8     | 437.5     | 376.0 |
| 1-naphthol                 | 291.0       | 329.1     | 290.5     |           |           |           |       | 331.0      | 362.7     | 320.8     |           |           |           |       |
| 5-sulfonate-1-naphthol     | 303.0       | 347.2     | 303.0     | 424.0     | 362.1     | 430.2     | 349.0 | 338.0      | 412.8     | 349.0     | 533.0     | 446.4     | 542.1     | 435.0 |
| 3,6-disulfonate-1-naphthol | 295.0       | 344.6     | 304.3     | 386.0     | 329.4     | 415.6     | 342.0 | 350.0      | 381.2     | 338.8     | 487.0     | 416.6     | 495.6     | 407.0 |
| 5-tButyl-1-naphthol        | 295.0       | 334.3     | 302.4     | 369.0     | 301.4     | 383.4     | 327.0 | 335.0      | 370.9     | 330.3     | 449.0     | 387.8     | 460.3     | 387.0 |
| BCyP                       | 368.0       | 423.8     | 355.3     |           |           |           |       | 452.0      | 528.7     | 451.8     |           |           |           |       |
| CBCyP                      | 338.0       | 415.5     | 348.1     | 462.0     | 387.4     | 473.7     |       | 451.0      | 530.9     | 451.5     | 651.0     | 560.3     | 640.2     |       |
| 3HF                        | 345.0       | 382.8     | 334.2     | 433.0     | 394.3     | 475.5     | 391.0 | 408.0      | 462.5     | 403.4     | 498.0     | 449.5     | 521.4     | 453.0 |
| Protonated DEA3HF          | 346.0       | 380.5     | 330.2     |           |           |           |       | 418.0      | 474.3     | 414.7     |           |           |           |       |
| DEA3HF                     | 418.0       | 474.3     | 414.7     |           |           |           |       | 445.0      | 501.8     | 437.6     |           |           |           |       |
| F3HF                       | 345.0       | 380.4     | 331.9     | 435.0     | 395.7     | 472.7     | 387.0 | 408.0      | 459.8     | 403.2     | 495.0     | 431.7     | 510.3     | 447.0 |
| EG-dHONI                   | 382.0       | 421.8     | 372.0     | 454.0     | 374.8     | 503.7     | 408.0 | 441.0      | 501.2     | 434.5     | 630.0     | 502.1     | 643.6     | 509.0 |
| COOH-dHONI                 | 382.0       | 419.7     | 372.5     | 436.0     | 360.2     | 525.0     | 405.0 | 439.0      | 501.2     | 433.1     | 624.0     | 505.0     | 643.4     | 511.0 |
| EG-SHONI                   | 384.0       | 418.8     | 384.6     | 461.0     | 391.9     | 552.4     | 410.0 | 444.0      | 504.5     | 441.6     | 632.0     | 499.1     | 647.6     | 511.0 |
| o-cyanophenol              | 295.0       | 313.4     | 291.0     | 335.6     | 306.2     |           | 311.5 | 324.7      | 352.3     | 319.1     | 380.2     | 348.7     | 394.5     | 350.9 |
| m-cyanophenol              | 292.4       | 311.6     | 288.0     | 331.1     | 303.2     | 347.3     | 308.6 | 319.5      | 347.7     | 313.9     | 404.9     | 345.5     | 423.7     | 347.2 |
| p-cyanophenol              | 246.3       | 266.0     | 246.3     | 304.0     | 279.3     | 319.4     | 280.1 | 273.2      | 306.2     | 275.8     | 340.1     | 297.9     | 372.0     | 303.0 |
| phenol                     | 273.2       | 292.1     | 271.3     | 307.7     | 280.6     | 321.9     | 286.9 | 294.6      | 321.6     | 291.0     | 363.6     | 315.2     | 372.8     | 318.0 |

**Table S6.** Calculated  $\Delta G^*$  and the  $pK_a^*$  values by the Förster cycle with the  $E_{0-0}$  values defined by the maximum absorption wavelength (Abs. Max.), maximum emission wavelength (Emi. Max.), average of maximum absorption and emission wavelengths (Avg. Max.), average of the first moments of absorption and emission spectra (1<sup>st</sup> Mom.), crossing point (Cross), and optical bandgap (OB).

| Photoacids                 | $\Delta G^*$<br>(kJ/mol) | Abs.<br>Max. | Emi.<br>Max. | Avg.<br>Max. | 1 <sup>st</sup> Mom. | Cross | OB    |
|----------------------------|--------------------------|--------------|--------------|--------------|----------------------|-------|-------|
| Coumarin 183               | 1139.2                   | -5.90        | 0.95         | -2.47        | 0.79                 | -1.85 | -1.50 |
| HPTS                       | 1146.1                   | 1.76         | 2.63         | 2.19         | 2.27                 | 2.17  | 1.97  |
| 2-naphthol                 | 1173.3                   | 6.30         | -0.39        | 2.95         | 2.89                 | 2.81  | 2.78  |
| 1-naphthol                 | 1140.0                   | 0.69         |              |              | 2.60                 |       | 3.49  |
| 5-sulfonate-1-naphthol     | 1123.7                   | 1.24         | -1.71        | -0.24        | -1.19                | -3.47 | -1.86 |
| 3,6-disulfonate-1-naphthol | 1138.0                   | -2.57        | -2.66        | -2.61        | 1.02                 | -1.19 | -0.98 |
| 5-tButyl-1-naphthol        | 1144.0                   | 1.32         | -0.32        | 0.50         | 2.30                 | -0.14 | -1.04 |
| BCyP                       | 1151.4                   | -4.09        |              |              | -6.10                |       | -3.32 |
| CBCyP                      | 1127.8                   | -9.54        | -7.17        | -8.36        | -6.65                |       | -7.83 |
| 3HF                        | 1147.7                   | 0.22         | 3.28         | 1.75         | 2.28                 | 2.26  | 1.61  |
| Protonated<br>DEA3HF       | 1107.7                   | -7.19        |              |              | -9.69                |       | -7.65 |
| DEA3HF                     | 1213.9                   | 7.50         |              |              | 7.90                 |       | 8.12  |
| F3HF                       | 1159.7                   | 0.95         | 4.49         | 2.72         | 3.11                 | 3.06  | 3.36  |
| EG-dHONI                   | 1143.5                   | 1.46         | -4.10        | -1.32        | 0.23                 | -1.40 | -2.23 |
| COOH-dHONI                 | 1114.7                   | 1.67         | -5.69        | -2.01        | 1.19                 | -1.94 | -3.61 |
| EG-SHONI                   | 1038.6                   | 0.62         | -4.30        | -1.84        | 1.70                 | -2.11 | -1.99 |
| o-cyanophenol              | 1138.0                   | 0.47         | -0.37        | 0.05         |                      | -0.58 | -0.90 |
| m-cyanophenol              | 1156.9                   | 2.26         | -3.19        | -0.46        | -0.10                | 0.79  | 0.62  |
| p-cyanophenol              | 1152.8                   | -0.65        | 0.40         | -0.12        | -1.45                | 2.08  | 0.21  |
| phenol                     | 1205.6                   | 4.44         | -0.48        | 1.98         | 2.95                 | 2.87  | 2.61  |



**Table S7.**  $pK_a^*$  values of photoacids obtained from differently-defined  $E_{0-0}$  values.

| Photoacids                | Abs. Max. | Emi. Max. | Avg. Max. | Crossing point | Optical bandgap |
|---------------------------|-----------|-----------|-----------|----------------|-----------------|
| C183                      | -5.90     | 0.95      | -2.47     | -1.85          | -1.50           |
| HPTS                      | 1.76      | 2.63      | 2.19      | 2.17           | 1.97            |
| 2naphthol                 | 6.30      | -0.39     | 2.95      | 2.81           | 2.78            |
| 1naphthol                 | 0.69      |           |           |                | 3.49            |
| 1naphthol-5sulfonate      | 1.24      | -1.71     | -0.24     | -3.47          | -1.86           |
| 1naphthol-3,6-disulfonate | -2.57     | -2.66     | -2.61     | -1.19          | -0.98           |
| 1naphthol-5tBu            | 1.32      | -0.32     | 0.50      | -0.14          | -1.04           |
| BCyP                      | -4.09     |           |           |                | -3.32           |
| CBCyP                     | -9.54     | -7.17     | -8.36     |                | -7.83           |
| 3HF                       | 0.22      | 3.28      | 1.75      | 2.26           | 1.61            |
| Protonated DEA3HF         | -7.19     |           |           |                | -7.65           |
| DEA3HF                    | 7.50      |           |           |                | 8.12            |
| F3HF                      | 0.95      | 4.49      | 2.72      | 3.06           | 3.36            |
| EG-dHONI                  | 1.46      | -4.10     | -1.32     | -1.40          | -2.23           |
| COOH-dHONI                | 1.67      | -5.69     | -2.01     | -1.94          | -3.61           |
| EG-SHONI                  | 0.62      | -4.30     | -1.84     | -2.11          | -1.99           |
| o-cyanophenol             | 0.47      | -0.37     | 0.05      | -0.58          | -0.90           |
| m-cyanophenol             | 2.26      | -3.19     | -0.46     | 0.79           | 0.62            |
| p-cyanophenol             | -0.65     | 0.40      | -0.12     | 2.08           | 0.21            |
| phenol                    | 4.44      | -0.48     | 1.98      | 2.87           | 2.61            |

## References

1. J. F. Joung, S. Kim and S. Park, *J. Phys. Chem. B*, 2015, **119**, 15509-15515.
2. J. F. Joung, S. Kim and S. Park, *Phys. Chem. Chem. Phys.*, 2017, **19**, 25509-25517.
3. J. F. Joung, S. Kim and S. Park, *J. Phys. Chem. B*, 2018, **122**, 5087-5093.
4. E. Pines, D. Huppert and N. Agmon, *J. Chem. Phys.*, 1988, **88**, 5620-5630.
5. R. Barnadas-Rodríguez and J. Estelrich, *J. Photochem. Photobiol. A: Chem.*, 2008, **198**, 262-267.
6. L. M. Tolbert and J. E. Haubrich, *J. Am. Chem. Soc.*, 2002, **112**, 8163-8165.
7. J.F.IrelandP.A.H.Wyatt, *Adv. Phys. Org. Chem.*, 1976, **12**, 131-221.
8. N. M. Trieff and B. R. Sundheim, *J. Phys. Chem.*, 2002, **69**, 2044-2059.
9. A. Bryson and R. W. Matthews, *Aust. J. Chem.*, 1963, **16**.
10. C. Cruces Blanco and F. Garcia Sanchez, *J. Photochem. Photobiol. A: Chem.*, 1988, **42**, 357-373.
11. S. P. Webb, L. A. Philips, S. W. Yeh, L. M. Tolbert and J. H. Clark, *J. Phys. Chem.*, 2002, **90**, 5154-5164.
12. E. Pines and G. R. Fleming, *Chem. Phys.*, 1994, **183**, 393-402.
13. M. Premont-Schwarz, T. Barak, D. Pines, E. T. Nibbering and E. Pines, *J. Phys. Chem. B*, 2013, **117**, 4594-4603.
14. E. Pines, D. Pines, T. Barak, B.-Z. Magnes, L. M. Tolbert and J. E. Haubrich, *Ber. Bunsenges. Phys. Chem.*, 1998, **102**, 511-517.
15. L. M. Tolbert and K. M. Solntsev, *Acc. Chem. Res.*, 2002, **35**, 19-27.
16. A. V. Popov, E. A. Gould, M. A. Salvitti, R. Hernandez and K. M. Solntsev, *Phys. Chem. Chem. Phys.*, 2011, **13**, 14914-14927.
17. R. Simkovitch, N. Karton-Lifshin, S. Shomer, D. Shabat and D. Huppert, *J. Phys. Chem. A*, 2013, **117**, 3405-3413.
18. C. Spies, S. Shomer, B. Finkler, D. Pines, E. Pines, G. Jung and D. Huppert, *Phys. Chem. Chem. Phys.*, 2014, **16**, 9104-9114.
19. M. S. Groves, K. J. Nelson, R. C. Nelson and K. Takematsu, *Phys. Chem. Chem. Phys.*, 2018, **20**, 21325-21333.
20. J. Ditkovich, T. Mukra, D. Pines, D. Huppert and E. Pines, *J. Phys. Chem. B*, 2015, **119**, 2690-2701.
21. I. Presiado, N. Karton-Lifshin, Y. Erez, R. Gepshtein, D. Shabat and D. Huppert, *J.*

- Phys. Chem. A*, 2012, **116**, 7353-7363.
22. A. A. Freitas, F. H. Quina and A. A. Macanita, *J. Phys. Chem. A*, 2014, **118**, 10448-10455.
  23. O. Green, O. Gajst, R. Simkovitch, D. Shabat and D. Huppert, *J. Phys. Chem. A*, 2017, **121**, 3079-3087.
  24. M. Swaminathan and S. K. Dogra, *Indian J. Chem.*, 1983, **22A**, 278-281.
  25. A. K. Mishra and S. K. Dogra, *J. Photochem.*, 1983, **23**, 163-169.
  26. J. H. Clark, S. L. Shapiro, A. J. Campillo and K. R. Winn, *J. Am. Chem. Soc.*, 2002, **101**, 746-748.
  27. K. Tsutsumi and H. Shizuka, *Chem. Phys. Lett.*, 1977, **52**, 485-488.
  28. O. Green, O. Gajst, R. Simkovitch, D. Shabat and D. Huppert, *J. Photochem. Photobiol. A: Chem.*, 2017, **349**, 230-237.
  29. L. Duarte, J. C. Germino, C. A. Braga, C. A. Barboza, T. D. Z. Atvars, F. D. S. Santos and F. S. Rodembusch, *Photochem. Photobiol. Sci.*, 2018, **17**, 231-238.
  30. M. Swaminathan and S. K. Dogra, *J. Chem. Soc., Perkin Trans. 2*, 1983, DOI: 10.1039/p29830001641.
  31. A. Orte, E. M. Talavera, A. L. Macanita, J. C. Orte and J. M. Alvarez-Pez, *J. Phys. Chem. A*, 2005, **109**, 8705-8718.
  32. T. Kumpulainen, B. H. Bakker, M. Hilbers and A. M. Brouwer, *J. Phys. Chem. B*, 2015, **119**, 2515-2524.
  33. R. Simkovitch, E. Kisin-Finfer, S. Shomer, R. Gepshtein, D. Shabat and D. Huppert, *J. Photochem. Photobiol. A: Chem.*, 2013, **254**, 45-53.
  34. S. Kaneko, S. Yotoriyama, H. Koda and S. Tobita, *J. Phys. Chem. A*, 2009, **113**, 3021-3028.
  35. B. Szczepanik and S. Styrz, *Spectrochim. Acta A Mol. Biomol. Spectrosc.*, 2011, **79**, 451-455.
  36. E. L. Wehry and L. B. Rogers, *J. Am. Chem. Soc.*, 2002, **87**, 4234-4238.
  37. I. Avigal, J. Feitelson and M. Ottolenghi, *J. Chem. Phys.*, 1969, **50**, 2614-2617.
  38. M. P. Bratzel, J. J. Aaron, J. D. Winefordner, S. G. Schulman and H. Gershon, *J. Phys. Chem.*, 2002, **77**, 1595-1598.
